# Supplementary material for: NCP activates chloroplast transcription by controlling phytochrome-dependent dual nuclear and plastidial switches
Source: PubMed Central journal article supplement (PMC6570768; doi:10.1038/s41467-019-10517-1), 2019-06-14
Supplement: 41467_2019_10517_MOESM1_ESM.pdf [file 41467_2019_10517_MOESM1_ESM.pdf]

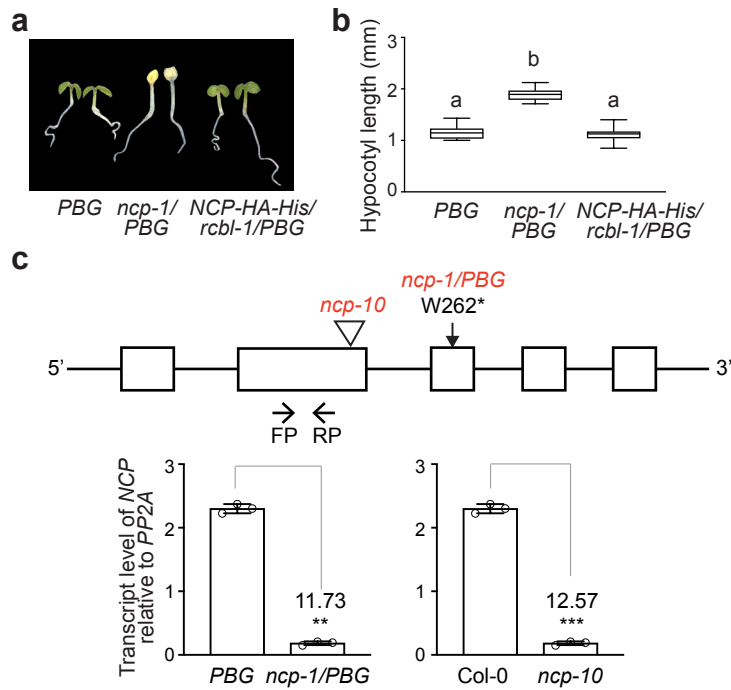

**Supplementary Fig. 1. Expressing HA and His tagged *At2g31840*, *NCP-HA-His*, rescues *ncp-1/PBG*.** **a**, Representative images of 4-day-old *PBG*, *ncp-1/PBG*, and *NCP-HA-His/ncp-1/PBG* seedlings grown in  $10 \mu\text{mol m}^{-2} \text{s}^{-1}$  R light. **b**, Box-and-whisker plot showing hypocotyl length measurements for seedlings from **a**. The boxes represent from the 25th to the 75th percentiles, the bars equal the median values. Samples with different letters have statistically significant differences in hypocotyl length (ANOVA, Tukey's HSD,  $p \leq 0.0001$ ,  $n > 20$ ). **c**, qRT-PCR analyses of the steady-state mRNA levels of *NCP* in 4-d-old *PBG*, *ncp-1/PBG*, *Col-0*, and *ncp-10* seedlings grown under  $10 \mu\text{mol m}^{-2} \text{s}^{-1}$  R light. Schematic of the intron-exon structure of *NCP* with the position of mutations are shown. The position for qPCR primers (FP and RP) is located with arrows. The transcript levels of *NCP* were calculated relative to those of *PP2A*. Error bars represent SD of three biological replicates. Asterisks indicate a statistically significant difference in the transcript levels of the bridged columns (Student's *t*-test, \*\*,  $p \leq 0.01$ , \*\*\*  $p \leq 0.001$ ). The source data underlying the hypocotyl measurements in **b** and the qRT-PCR data in **c** are provided in the Source Data file.

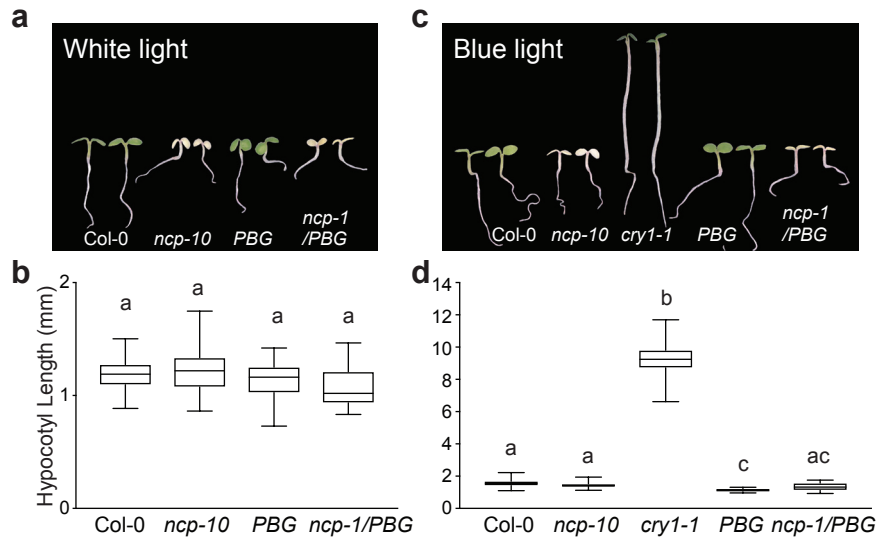

**Supplementary Fig. 2. *ncp* mutants exhibit normal hypocotyl responses to blue and white light.**

**a**, Representative images of 4-d-old Col-0, *ncp-10*, PBG, and *ncp-1/PBG* seedlings grown in  $33 \mu\text{mol m}^{-2} \text{s}^{-1}$  white light. **b**, Box-and-whisker plots for hypocotyl length measurements of seedlings in **a**. **c**, Representative images of 4-d-old Col-0, *ncp-10*, *cry1-1*, PBG, and *ncp-1/PBG* seedlings grown in  $10 \mu\text{mol m}^{-2} \text{s}^{-1}$  blue light. **d**, Box-and-whisker plots for hypocotyl length measurements of seedlings in **c**. For **b** and **d**, the boxes represent from the 25th to the 75th percentiles, and the bars equal the median values. Samples with different letters indicate statistically significant differences in hypocotyl length (ANOVA, Tukey's HSD,  $p \leq 0.001$ ,  $n > 40$ ). The source data underlying the hypocotyl measurements in **b** and **d** are provided in the Source Data file.

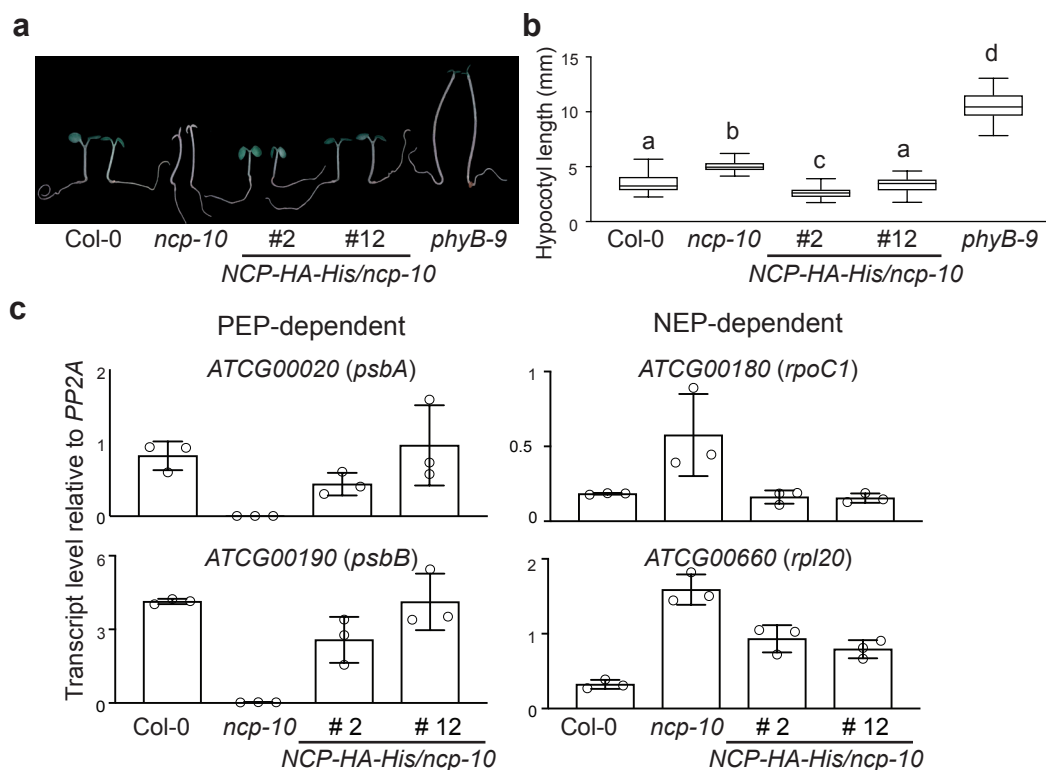

**Supplementary Fig. 3. Expressing HA and His tagged *NCP-HA-His* rescues *ncp-10*.**

**a**, Representative images of 4-d-old Col-0, *ncp-10*, *NCP-HA-His/ncp-10* line #2 and #12, and *phyB-9* seedlings grown in  $10 \mu\text{mol m}^{-2} \text{s}^{-1}$  R light. **b**, Box-and-whisker plots showing hypocotyl length measurements of seedlings from **a**. The boxes represent from the 25th to the 75th percentiles, and the bars equal the median values. Samples with different letters exhibit statistically significant difference in hypocotyl length (ANOVA, Tukey's HSD,  $p \leq 0.001$ ,  $n > 30$ ). **c**, qRT-PCR analyses of the steady-state mRNA levels of selected PEP-dependent and NEP-dependent genes in 4-d-old Col-0, *ncp-10*, *ncp-10/NCP-HA-His* #2, and *ncp-10/NCP-HA-His* #12 grown in  $10 \mu\text{mol m}^{-2} \text{s}^{-1}$  R light. Transcript levels were calculated relative to those of *PP2A*. Error bars represent SD of three biological replicates. The source data underlying the hypocotyl measurements in **b** and the qRT-PCR data in **c** are provided in the Source Data file.

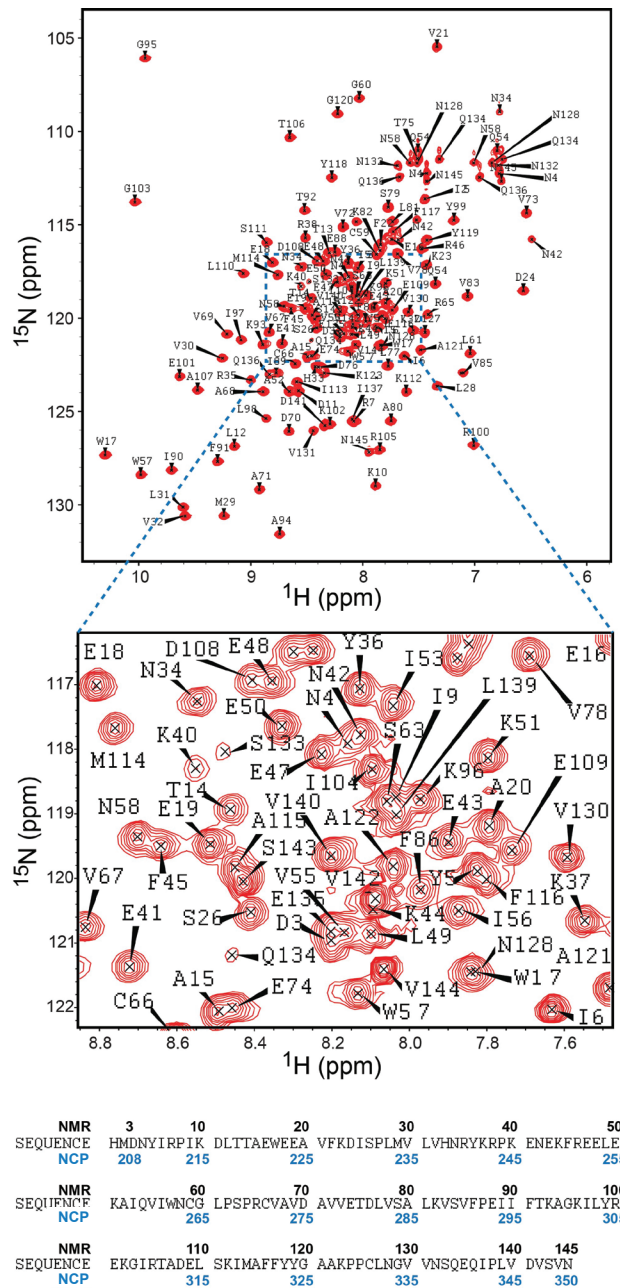

**Supplementary Fig. 4.  $^1\text{H}$ - $^{15}\text{N}$  HSQC spectrum of the NCP Trx-like domain.**

The sequence of the NMR construct is shown below the NMR spectrum. Resonance assignments of individual signals reflect the residue numbers within the NMR construct. The residue numbers within the full-length NCP protein are labeled in blue beneath the sequence.

**a**

Neural network secondary structure prediction  
based on chemical shift indices (CSI)

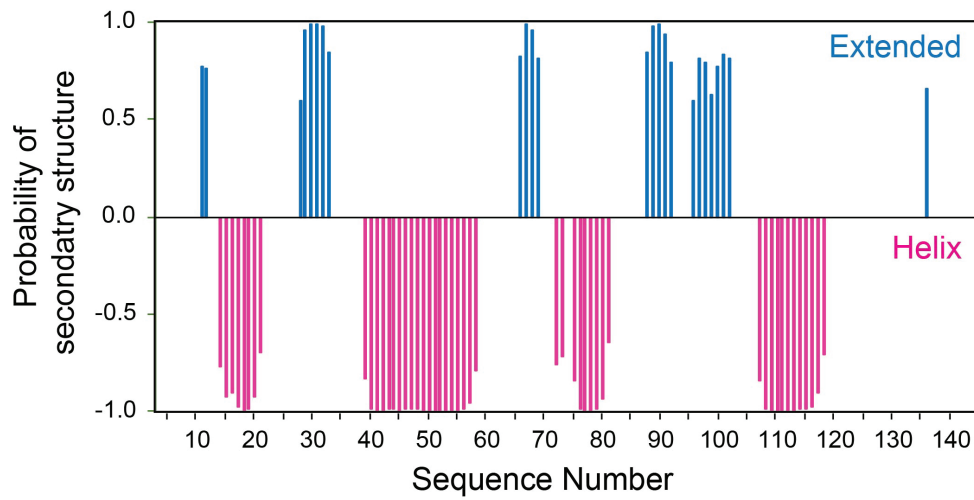**b**

|              |  |            |            |            |            |            |            |
|--------------|--|------------|------------|------------|------------|------------|------------|
| <b>NCP</b>   |  | <b>208</b> | <b>215</b> | <b>225</b> | <b>235</b> | <b>245</b> | <b>255</b> |
| <b>NMR</b>   |  | <b>3</b>   | <b>10</b>  | <b>20</b>  | <b>30</b>  | <b>40</b>  | <b>50</b>  |
| SEQUENCE     |  | DNYIRPIK   | DLTTAEWEEA | VFKDISPLMV | LVHNRYKRPK | ENEKFREELE |            |
| PREDICTED_SS |  | LLLLLLL    | EELHHHHH   | HLLLLLEE   | EELLLLLH   | HHHHHHH    |            |
| CONFIDENCE   |  | 08899984   | 5545889998 | 3478997199 | 9966899869 | 9999999999 |            |
|              |  |            |            |            |            |            |            |
| <b>NCP</b>   |  | <b>265</b> | <b>275</b> | <b>285</b> | <b>295</b> | <b>305</b> |            |
| <b>NMR</b>   |  | <b>60</b>  | <b>70</b>  | <b>80</b>  | <b>90</b>  | <b>100</b> |            |
| SEQUENCE     |  | KAIQVIWNCG | LPSPRCVAVD | AVVETDLVSA | LKVSVFPEII | FTKAGKILYR |            |
| PREDICTED_SS |  | HHHHHHHLL  | LLLLLEEL   | LHHLHHHHH  | HLLLLLEE   | EELLEEEEE  |            |
| CONFIDENCE   |  | 9999999548 | 9998669965 | 6543699998 | 2689551699 | 8507716525 |            |
|              |  |            |            |            |            |            |            |
| <b>NCP</b>   |  | <b>315</b> | <b>325</b> | <b>335</b> | <b>345</b> | <b>350</b> |            |
| <b>NMR</b>   |  | <b>110</b> | <b>120</b> | <b>130</b> | <b>140</b> | <b>145</b> |            |
| SEQUENCE     |  | EKGIRTADEL | SKIMAFFYYG | AAKPPCLNGV | VNSQEIQPLV | DVSVN      |            |
| PREDICTED_SS |  | EELLLLHHH  | HHHHHHHLL  | LLLLLLLLL  | LLLLLELLL  | LLLLL      |            |
| CONFIDENCE   |  | 6636687999 | 9999997468 | 9999879971 | 6898236778 | 88880      |            |

**Supplementary Fig. 5. Secondary structure analysis of the NCP Trx-like domain.**

**a**, Neural network secondary structure prediction based on the chemical shift indices (CSI) analysis of the NCP Trx-like domain. The probability of each residue adopting an extended or helical conformation is plotted in blue or pink, respectively. **b**, The predicted secondary structures and confidence levels along the primary protein sequence. Residue numbers in the NMR construct and full-length NCP are colored in black and blue respectively. Residues predicted in the extended conformation are colored in blue, while those in the helical conformation are colored in pink.

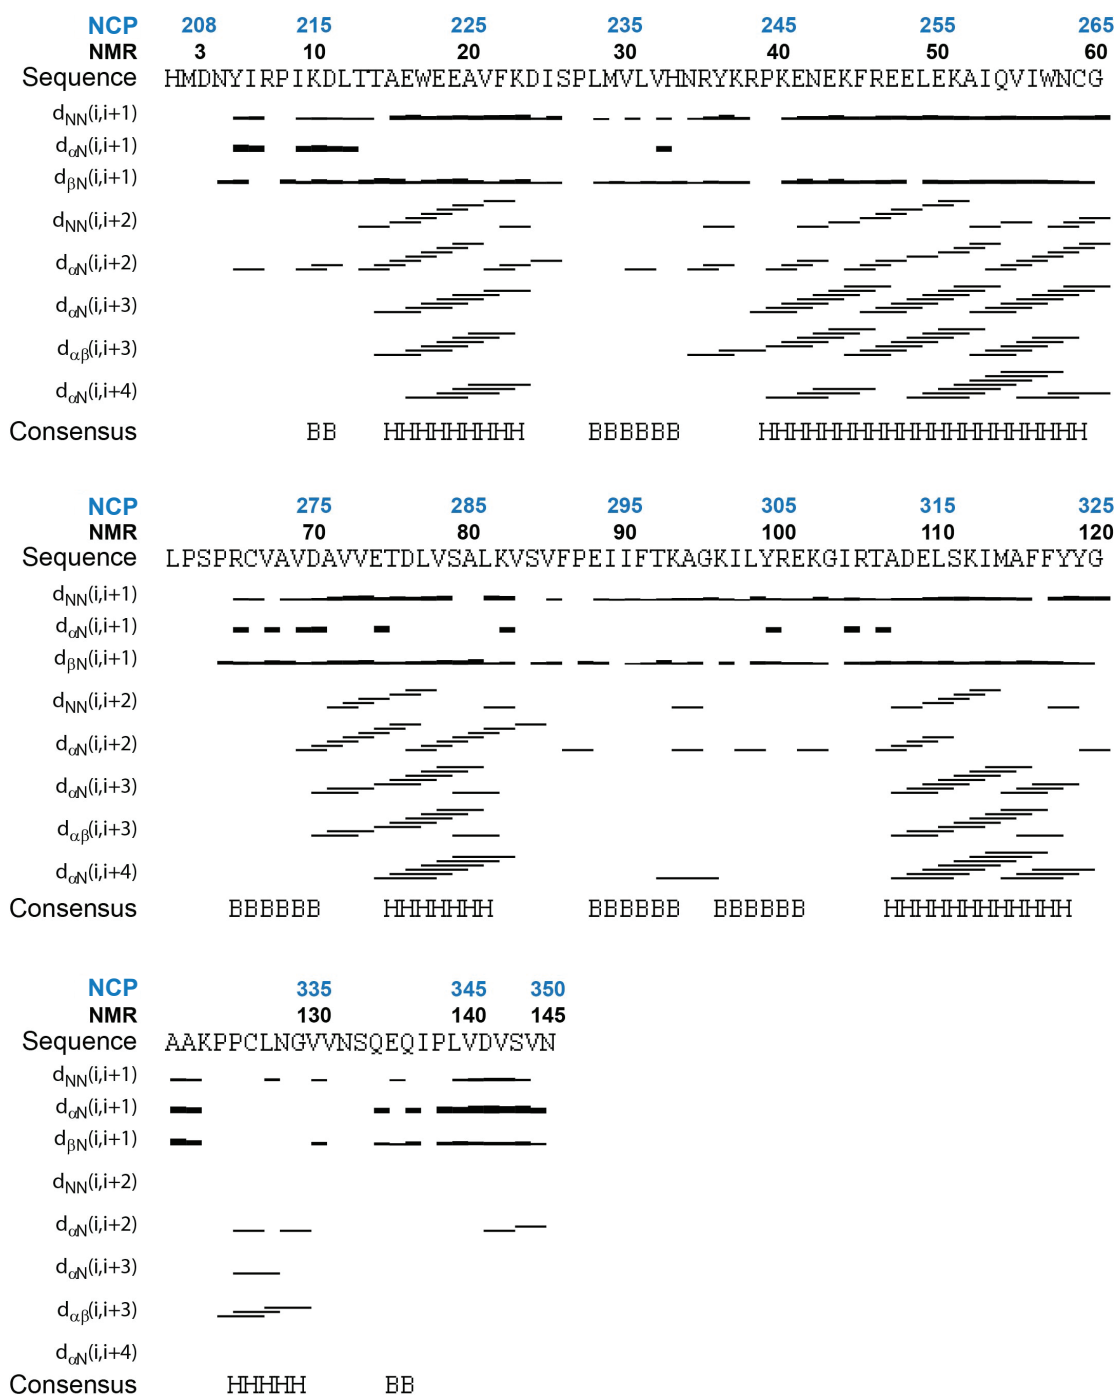

**Supplementary Fig. 6. Secondary structure determination of the NCP Trx-like domain based on the NOE pattern.**

The presence of  $\beta$ -strands (extended conformations) is reflected by very strong NOE signals of  $d_{\alpha N}(i, i+1)$  (indicated by thick bars), whereas the presence of helices is reflected by the characteristic NOEs of  $d_{\alpha\beta}(i, i+3)$ ,  $d_{\alpha N}(i, i+3)$  and  $d_{\alpha N}(i, i+4)$ .

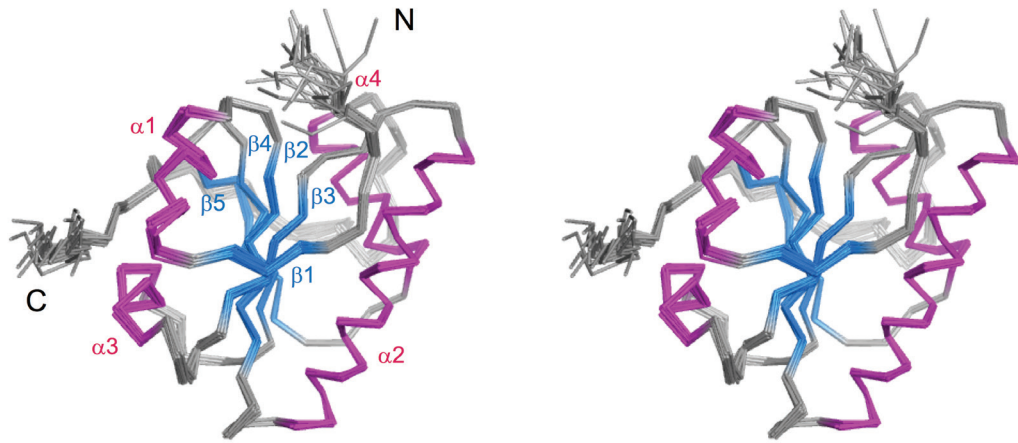

**Supplementary Fig. 7. A stereo view of the NMR structural ensemble of the NCP Trx-like structures.** Alpha-helices and beta-strands are colored in magenta and blue, respectively.

**Supplementary Table 1.** Primers used for making plasmid constructs

| <b>Accession</b> | <b>Gene name</b>                 | <b>Vector name</b> | <b>Forward primer</b>                                      | <b>Reverse primer</b>                                   |
|------------------|----------------------------------|--------------------|------------------------------------------------------------|---------------------------------------------------------|
| <i>At2g31840</i> | <i>NCP-HA-His</i>                | pCHF1              | TTCTTCTATAAAAACAATACCATGATTCTTCCATTTTCGACACAGTTC<br>ACTTGC | GGGGGTGGGGGTGGGGGTGGGGGTGGGATTCACACTTACA<br>TCGACTAAAGG |
| <i>At2g31840</i> | <i>NCP-CGP-Flag</i>              | pCHF3              | ACGGGGGACGAGCTCGGTACCCGGGATGATTCTTCCATTTTCGAC              | GTGTTGGAGTAGGCTCTAGAATATTCACACTTACATCGACTA              |
| <i>At2g31840</i> | <i>NCP-FL</i>                    | pCMX-PL2           | TCGAGAAGCTTGATATCGAATTCATGATTCTTCCATTTTCGAC                | TACTAGCTAGCTGGCCAGGATCCTCAGTGATGGTGATGGTG               |
| <i>At2g31840</i> | <i>NCP<math>\Delta</math>48</i>  | pCMX-PL2           | TCGAGAAGCTTGATATCGAATTCATGTCCTCCTCGAAGTGG                  | TACTAGCTAGCTGGCCAGGATCCTCAGTGATGGTGATGGTG               |
| <i>At2g31840</i> | <i>NCP-FL</i>                    | pET15b             | ATACATATGATGATTCTTCCATTTTC                                 | TTGCTCGAGTTAATTCACACTTACATCGAC                          |
| <i>At2g31840</i> | <i>NCP<math>\Delta</math>206</i> | pET15b             | TAACATATGGGAGATGATAGTGAGAAGGA                              | TTGCTCGAGTTAATTCACACTTACATCGAC                          |
| <i>At4g28590</i> | <i>RCB<math>\Delta</math>98</i>  | pET28a             | CAGCAAATGGGTCGCGCTAGTGAAGCAGACGCTGTG                       | CTCGAGTGC GGCCGCACTAACAGTACGGGGTTAC                     |
| <i>At4g28590</i> | <i>RCB<math>\Delta</math>197</i> | pET28a             | CAGCAAATGGGTCGCGCTGAGATTGATGATAGTTGGG                      | CTCGAGTGC GGCCGCACTAACAGTACGGGGTTAC                     |



**Supplementary Table 2.** qRT-PCR primers for the plastidial-encoded genes examined in this study

| <b>Accession</b> | <b>Gene name</b> | <b>Primer for cDNA synthesis</b> | <b>Primer pair for qRT-PCR</b>                      |
|------------------|------------------|----------------------------------|-----------------------------------------------------|
| ATCG00020        | <i>psbA</i>      | TAGATGGAGCCTCAACAGCAGCTA         | ACATTTCTTCTTAGCGGCTT<br>CGTCCTTGACTATCAACTACTGA     |
| ATCG00680        | <i>psbB</i>      | CATCCAAATCTGGATCAATACCAG         | ACATTTCTTCTTAGCGGCTT<br>CGTCCTTGACTATCAACTACTGA     |
| ATCG00490        | <i>rbcL</i>      | CTTCACAAGCAGCAGCTAGTTCAGG        | GGAGATGATTCTGTACTACAAT<br>GTCCCTCATTACGAGCTTGTAC    |
| ATCG00190        | <i>rpoB</i>      | CAATGATAGTGGTACCAAGTACTTC        | CTAGTGGACATTATGCACTTGT<br>CAGATTTATAAGTAAGCATCTCTTG |
| ATCG00180        | <i>rpoC1</i>     | GTATAGCTTCCTCGATTTCTCG           | GATGCAATTGGAGCTTATCG<br>CGATAGGAACTTCTCTTGAAGC      |
| ATCG00660        | <i>rpl20</i>     | TGTGCAAGTATTTTCCGATTAAG          | GAGCTTTAGTTTCGGCTCATC<br>AATTACGGCATTATTTCGAGTG     |

**Supplementary Table 3.** qRT-PCR primers for the nuclear genes examined in this study.

| <b>Accession</b> | <b>Gene name</b> | <b>Forward primer</b>     | <b>Reverse primer</b>    |
|------------------|------------------|---------------------------|--------------------------|
| AT1G69960        | <i>PP2A</i>      | TATCGGATGACGATTCTTCGTGCAG | GCTTGGTCGACTATCGAATGAGAG |
| AT2G31840        | <i>NCP</i>       | GAAGCGAGTCTCGATGATCC      | GCTTCTGCATCTTCCTCCTC     |

**Supplementary Table 4.** Gene ID or transcript ID for phylogenetic analysis of NCP and RCB homologues.

| Taxas                       | Gene name | Gene ID         | Transcript Identifier                            | PAC ID   | Source                                    | 1KP Identifier                            |
|-----------------------------|-----------|-----------------|--------------------------------------------------|----------|-------------------------------------------|-------------------------------------------|
| <b>Angiosperm</b>           |           |                 |                                                  |          |                                           |                                           |
| <i>Amborella trichopoda</i> | NCP       | ATR_00066G00940 | evm_27.model.AmTr_v1.0_sc<br>affold00066.94 CDS  | -        | Genome,<br>Amborella<br>Genome<br>Project | -                                         |
|                             | RCB       | ATR_00066G01920 | evm_27.model.AmTr_v1.0_sc<br>affold00066.192 CDS | -        |                                           | Genome,<br>Amborella<br>Genome<br>Project |
| <i>Arabidopsis thaliana</i> | NCP       | AT2G31840.1     | -                                                | 19643553 | Genome,<br>Phytozome                      | -                                         |
|                             | RCB       | AT4G28590.1     | -                                                | 19645001 |                                           | Genome,<br>Phytozome                      |
| <i>Oriza sativa</i>         | NCP       | LOC_Os05g34470  | -                                                | 24152372 | Genome,<br>Phytozome                      | -                                         |
|                             | RCB       | LOC_Os01g61320  | -                                                | 24114913 |                                           | Genome,<br>Phytozome                      |
| <b>Gymnosperm</b>           |           |                 |                                                  |          |                                           |                                           |
| <i>Ginkgo biloba</i>        | NCP       | -               | SGTW_scaffold_2001407<br>Ginkgo_biloba           | -        | Transcriptome,<br>1KP                     | SGTW                                      |
|                             | RCB       | -               | SGTW_scaffold_2037234<br>Ginkgo_biloba           | -        |                                           | Transcriptome,<br>1KP                     |
| <i>Picea abies</i>          | NCP       | MA_875929       | -                                                | -        | Congenie,<br>Genome                       | -                                         |
|                             | RCB       | MA_85974        | -                                                | -        |                                           | Congenie,<br>Genome                       |
| <i>Gnetum montanum</i>      | NCP       | GMO00014786     | GTHK-0020791-2011195-<br>Gnetum_montanum_987     | -        | Transcriptome,<br>1KP                     | GTHK                                      |
|                             | RCB       | GMO00015329     | GTHK-2055953-0021387-<br>Gnetum_montanum_1122    | -        |                                           | Transcriptome,<br>1KP                     |
| <b>Fern</b>                 |           |                 |                                                  |          |                                           |                                           |
| <i>Equisetum diffusum</i>   | NCP/RCB   | -               | CAPN-1001418-2006808-<br>Equisetum_diffusum_996  | -        | Transcriptome,<br>1KP                     | CAPN                                      |

|                                       |         |               |                                                              |   |                       |      |
|---------------------------------------|---------|---------------|--------------------------------------------------------------|---|-----------------------|------|
| <i>Psilotum nudum</i>                 | NCP/RCB | -             | QVMR-2010863-0072637-<br>Psilotum_nudum_1272                 | - | Transcriptome,<br>1KP | QVMR |
| <i>Angiopteris evecta</i>             | NCP/RCB | -             | NHCM-0020880-2008213-<br>Angiopteris_evecta                  | - | Transcriptome,<br>1KP | NHCM |
| <b>Lycophytes</b>                     |         |               |                                                              |   |                       |      |
| <i>Selaginella moellendorffii</i>     | NCP/RCB | SM00002G04620 | 404435                                                       | - | Genome,<br>Phytozome  | -    |
| <i>Pseudolycopodiella caroliniana</i> | NCP/RCB | -             | UPMJ-2011768-0026604-<br>Pseudolycopodiella_caroliniana_1203 | - | Transcriptome,<br>1KP | UPMJ |
| <b>Hornwort</b>                       |         |               |                                                              |   |                       |      |
| <i>Nothoceros vincentianus</i>        | NCP/RCB | -             | TCBC-2019434-0029159-<br>Nothoceros_vincentianus_1187        | - | Transcriptome,<br>1KP | TCBC |
| <b>Liverwort</b>                      |         |               |                                                              |   |                       |      |
| <i>Sphaerocarpos texanus</i>          | NCP/RCB | -             | HERT-0056768-2043911-<br>Sphaerocarpos_texanus_930           | - | Transcriptome,<br>1KP | HERT |
| <b>Moss</b>                           |         |               |                                                              |   |                       |      |
| <i>Physcomitrella patens</i>          | NCP/RCB | Pp3c3_26500   | PHYPADRAFT_172419                                            | - | Genome,<br>Phytozome  | -    |

"-" indicates not applicable.
